# Supplementary material
Source: MDPI journal article supplement (https://www.mdpi.com/2073-4344/13/10/1388)
Supplement: s1 [file s1]

*Supporting Information for*

## **Mechanistic Details of the Titanium-Mediated Polycondensation Reaction of Polyesters: A DFT Study**

*Zhenyu Guan<sup>1,2,3</sup>, Jialong Zhang<sup>3</sup>, Wenle Zhou<sup>3</sup>, Youcai Zhu<sup>4</sup>, Zhen Liu<sup>4\*</sup>, Yumei Zhang<sup>1,2\*</sup>, and Yue Zhang<sup>1,2</sup>*

<sup>1</sup>State Key Laboratory for Modification of Chemical Fibers and Polymer Materials, Donghua University, Shanghai, 201620, China

<sup>2</sup>College of Materials Science and Engineering, Donghua University, Shanghai, 201620, China

<sup>3</sup>Shanghai Research Institute of Petrochemical Technology, Shanghai, 201208, China

<sup>4</sup>School of Chemical Engineering, East China University of Science and Technology, Shanghai, 200237, China

\*Corresponding author:

Zhen Liu, Email: liuzhen@ecust.edu.cn

Yumei Zhang, Email: zhangym@dhu.edu.cn

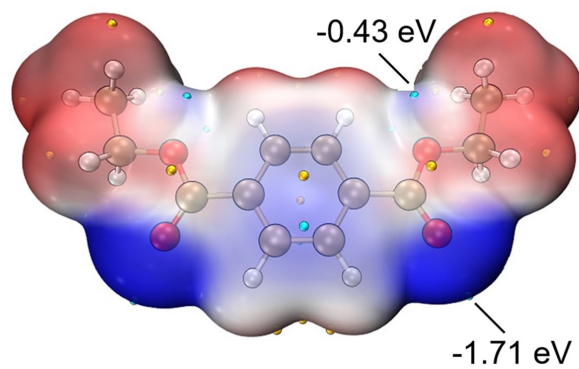

**Figure S1.** Molecular electrostatic potential (MESP) on the 0.001 a.u. electron density isosurface for the DET molecule.

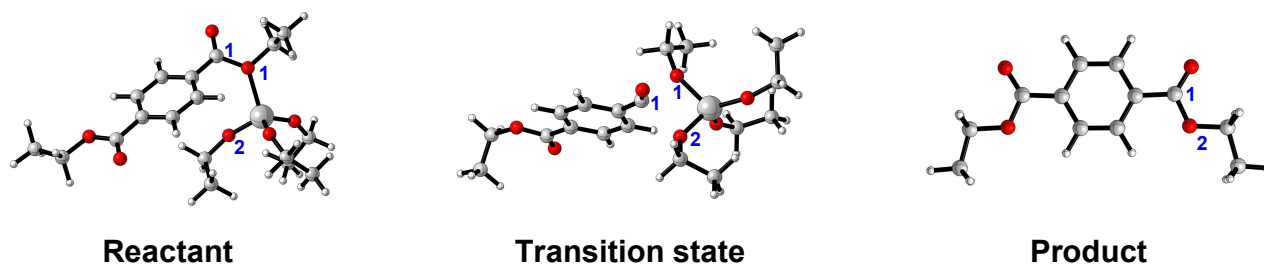

**Figure S2.** Optimised structure of the reactant, transition state, and product in M2 mechanism over  $\text{Ti}(\text{OEt})_3^+$  catalyst.

## List of Cartesian coordinates

C<sub>2</sub>H<sub>5</sub>OH

Geometry with 9 atoms:

Thermal correction to Gibbs Free Energy:  
0.054277

Total energy: -155.112414

|   |           |           |           |
|---|-----------|-----------|-----------|
| O | 1.237738  | -0.259215 | -0.109759 |
| C | 0.085866  | 0.554463  | 0.046588  |
| C | -1.212756 | -0.240108 | -0.021498 |
| H | 0.119388  | 1.291877  | -0.773132 |
| H | 0.125070  | 1.131638  | 0.993262  |
| H | -1.272645 | -0.964567 | 0.808815  |
| H | -2.088741 | 0.425275  | 0.048609  |
| H | -1.272968 | -0.800279 | -0.968409 |
| H | 1.249326  | -0.896363 | 0.618393  |

Int1

Geometry with 30 atoms:

Thermal correction to Gibbs Free Energy:  
0.197627

Total energy: -766.971469

|   |           |           |           |
|---|-----------|-----------|-----------|
| C | 2.826509  | -0.547521 | -0.232955 |
| O | 3.624852  | 0.525075  | -0.303979 |
| C | 5.051676  | 0.305596  | -0.357762 |
| C | 5.628844  | 0.070869  | 1.027228  |
| O | 3.232184  | -1.691806 | -0.227427 |
| H | 5.453651  | 1.221326  | -0.812498 |
| H | 5.256524  | -0.544811 | -1.025091 |
| H | 5.228236  | -0.856386 | 1.462413  |
| H | 5.389717  | 0.911130  | 1.697151  |
| H | 6.724337  | -0.021136 | 0.962453  |
| O | -3.217672 | 1.923386  | 0.044660  |
| C | -2.808681 | 0.780512  | 0.026796  |
| C | -1.359260 | 0.412167  | -0.040114 |
| C | -0.928431 | -0.924935 | -0.050603 |
| C | 0.432552  | -1.215698 | -0.112259 |
| C | 1.377208  | -0.178420 | -0.165802 |
| C | 0.946293  | 1.158675  | -0.155100 |
| C | -0.414672 | 1.449470  | -0.091987 |
| H | -0.765311 | 2.482829  | -0.082149 |
| H | 1.681197  | 1.962885  | -0.195320 |
| H | 0.783065  | -2.249091 | -0.120512 |

|   |           |           |           |
|---|-----------|-----------|-----------|
| H | -1.663176 | -1.729318 | -0.009880 |
| O | -3.610074 | -0.289451 | 0.065150  |
| C | -5.031371 | -0.050576 | 0.133496  |
| C | -5.725134 | -1.395007 | 0.143616  |
| H | -5.328496 | 0.563543  | -0.731849 |
| H | -5.247344 | 0.535118  | 1.041750  |
| H | -5.494004 | -1.961771 | -0.771458 |
| H | -6.814997 | -1.250958 | 0.196700  |
| H | -5.410922 | -1.991771 | 1.013742  |

Int2

Geometry with 63 atoms:

Thermal correction to Gibbs Free Energy:  
0.451385

Total energy: -2234.766524

|   |           |           |           |
|---|-----------|-----------|-----------|
| C | -5.231435 | -0.011341 | 0.323783  |
| O | -5.406243 | -1.322289 | 0.114195  |
| C | -6.693048 | -1.894639 | 0.435256  |
| C | -7.696949 | -1.665752 | -0.681052 |
| O | -6.087843 | 0.719506  | 0.778347  |
| H | -7.047054 | -1.465525 | 1.384578  |
| H | -6.489162 | -2.964283 | 0.581036  |
| H | -7.903988 | -0.592504 | -0.802881 |
| H | -8.642427 | -2.176615 | -0.440460 |
| H | -7.318472 | -2.066173 | -1.634188 |
| O | 0.933751  | 1.106564  | -1.482360 |
| C | 0.079487  | 1.847976  | -1.020041 |
| C | -1.308682 | 1.402200  | -0.709194 |
| C | -1.625297 | 0.048487  | -0.901794 |
| C | -2.893885 | -0.425659 | -0.579048 |
| C | -3.859981 | 0.450972  | -0.058425 |
| C | -3.543124 | 1.805962  | 0.129832  |
| C | -2.274656 | 2.281587  | -0.194084 |
| H | -2.022251 | 3.330791  | -0.039399 |
| H | -4.303576 | 2.473728  | 0.537742  |
| H | -3.138734 | -1.479138 | -0.714670 |
| H | -0.851918 | -0.629355 | -1.263180 |
| O | 0.296810  | 3.127316  | -0.733668 |
| C | 2.333368  | 3.553911  | 0.522523  |
| C | 1.648937  | 3.641110  | -0.829279 |
| H | 1.531931  | 4.680448  | -1.166193 |

|    |           |           |           |    |           |           |           |
|----|-----------|-----------|-----------|----|-----------|-----------|-----------|
| H  | 2.195273  | 3.068656  | -1.590646 | C  | -4.164302 | -0.177876 | 0.472927  |
| H  | 3.352107  | 3.965483  | 0.447136  | O  | -4.950182 | -0.190604 | -0.610793 |
| H  | 2.399942  | 2.506727  | 0.846669  | C  | -6.125212 | -1.030946 | -0.587949 |
| H  | 1.779235  | 4.129778  | 1.279811  | C  | -7.281090 | -0.351182 | 0.124463  |
| Ti | 2.119226  | -0.519908 | 0.136947  | O  | -4.382020 | -0.835581 | 1.471493  |
| O  | 1.373405  | -1.680521 | -1.045448 | H  | -5.867878 | -1.987872 | -0.109921 |
| C  | 1.404359  | -1.886057 | -2.438702 | H  | -6.353983 | -1.210885 | -1.647287 |
| C  | 2.826390  | -2.076110 | -2.952538 | H  | -7.506348 | 0.621957  | -0.338423 |
| H  | 3.291285  | -2.960622 | -2.488028 | H  | -7.044048 | -0.193872 | 1.186837  |
| H  | 3.436695  | -1.195123 | -2.696815 | H  | -8.180474 | -0.983335 | 0.059141  |
| H  | 2.836215  | -2.210152 | -4.046163 | O  | 0.973693  | 3.433877  | -1.272816 |
| H  | 0.933307  | -1.017981 | -2.936877 | C  | 0.709227  | 2.848162  | -0.241461 |
| H  | 0.788696  | -2.774081 | -2.676627 | O  | 1.549109  | 2.750341  | 0.793258  |
| O  | 3.539542  | 0.415274  | -0.478995 | C  | 2.880319  | 3.288372  | 0.637210  |
| C  | 4.924303  | 0.525163  | -0.249519 | C  | 3.773079  | 2.352582  | -0.160026 |
| C  | 5.238665  | 0.843413  | 1.207243  | H  | 2.809493  | 4.280060  | 0.164958  |
| H  | 4.769056  | 1.794497  | 1.503608  | H  | 3.245177  | 3.409911  | 1.666454  |
| H  | 6.326463  | 0.925414  | 1.363276  | H  | 3.409384  | 2.254915  | -1.192469 |
| H  | 4.846456  | 0.044915  | 1.855845  | H  | 4.798079  | 2.755215  | -0.183434 |
| H  | 5.323743  | 1.320064  | -0.907756 | H  | 3.781429  | 1.355410  | 0.301185  |
| H  | 5.424334  | -0.417567 | -0.543707 | C  | -0.590223 | 2.149938  | 0.005147  |
| O  | 1.016073  | 0.437391  | 1.240454  | C  | -0.872083 | 1.504988  | 1.218811  |
| C  | 0.561606  | 0.291949  | 2.562843  | C  | -2.052189 | 0.781749  | 1.363919  |
| C  | -0.855283 | -0.266157 | 2.609068  | C  | -2.966876 | 0.699659  | 0.303057  |
| H  | -1.550276 | 0.389256  | 2.062585  | C  | -2.708016 | 1.386772  | -0.894664 |
| H  | -1.203391 | -0.360543 | 3.650728  | C  | -1.525013 | 2.106832  | -1.039613 |
| H  | -0.888566 | -1.261534 | 2.137557  | H  | -1.294815 | 2.620554  | -1.973933 |
| H  | 0.593401  | 1.282059  | 3.057968  | H  | -3.422925 | 1.328247  | -1.715494 |
| H  | 1.248352  | -0.373793 | 3.122194  | H  | -2.267714 | 0.247435  | 2.290359  |
| O  | 2.840401  | -1.676223 | 1.310017  | H  | -0.148281 | 1.545299  | 2.031412  |
| C  | 3.202656  | -3.038033 | 1.259036  | Ti | 1.655807  | -1.122744 | 0.049538  |
| C  | 4.612105  | -3.216555 | 0.710181  | O  | 2.492198  | -0.334983 | 1.437128  |
| H  | 4.893740  | -4.281819 | 0.700757  | C  | 2.382207  | 0.106589  | 2.767116  |
| H  | 5.341857  | -2.666514 | 1.325004  | C  | 1.383081  | -0.720005 | 3.566638  |
| H  | 4.670928  | -2.831635 | -0.320431 | H  | 1.296234  | -0.339068 | 4.596696  |
| H  | 2.477756  | -3.581211 | 0.622595  | H  | 1.700316  | -1.774449 | 3.607303  |
| H  | 3.131679  | -3.458382 | 2.279236  | H  | 0.391112  | -0.687713 | 3.089788  |
|    |           |           |           | H  | 2.084816  | 1.171233  | 2.760550  |
|    |           |           |           | H  | 3.382164  | 0.053875  | 3.237677  |
|    |           |           |           | O  | 1.371541  | 0.090599  | -1.241998 |
|    |           |           |           | C  | 1.175106  | 0.354729  | -2.607761 |
|    |           |           |           | C  | 2.080207  | -0.499775 | -3.484483 |
|    |           |           |           | H  | 3.138998  | -0.290406 | -3.263019 |
|    |           |           |           | H  | 1.897731  | -0.292276 | -4.551026 |

Int3  
 Geometry with 63 atoms:  
 Thermal correction to Gibbs Free Energy:  
 0.450022  
 Total energy: -2234.770189

|   |           |           |           |
|---|-----------|-----------|-----------|
| H | 1.899879  | -1.569205 | -3.293022 |
| H | 1.363416  | 1.429519  | -2.779596 |
| H | 0.113443  | 0.171519  | -2.859254 |
| O | 2.721443  | -2.404908 | -0.651044 |
| C | 4.097432  | -2.565113 | -0.916510 |
| C | 4.920233  | -2.610602 | 0.364969  |
| H | 4.614789  | -3.465027 | 0.990351  |
| H | 4.761450  | -1.688308 | 0.945417  |
| H | 5.993668  | -2.710395 | 0.137253  |
| H | 4.447211  | -1.736776 | -1.562814 |
| H | 4.235069  | -3.498683 | -1.494008 |
| O | 0.120641  | -1.905953 | 0.532708  |
| C | -1.142143 | -2.413107 | 0.182890  |
| C | -1.490394 | -2.107762 | -1.268474 |
| H | -0.766771 | -2.586317 | -1.947985 |
| H | -1.458374 | -1.022391 | -1.440919 |
| H | -2.500798 | -2.471522 | -1.514678 |
| H | -1.902325 | -1.976489 | 0.854974  |
| H | -1.148338 | -3.506111 | 0.356364  |

Int5

Geometry with 57 atoms:

Thermal correction to Gibbs Free Energy:  
0.398707

Total energy: -2156.075404

|   |           |           |           |
|---|-----------|-----------|-----------|
| C | -5.557368 | 0.829541  | 0.035960  |
| O | -6.532095 | -0.001079 | -0.363923 |
| C | -7.873207 | 0.489282  | -0.269488 |
| O | -5.774434 | 1.945991  | 0.461505  |
| H | -8.123806 | 0.738303  | 0.772823  |
| H | -8.520289 | -0.317428 | -0.633560 |
| O | 0.590358  | -0.517533 | -1.279807 |
| C | -0.159936 | -1.298623 | -0.446301 |
| O | -0.170285 | -2.641101 | -0.791378 |
| C | 1.102561  | -3.204522 | -1.099709 |
| H | 1.844604  | -2.969415 | -0.319470 |
| H | 0.957695  | -4.291001 | -1.159419 |
| C | -1.598430 | -0.802791 | -0.323603 |
| C | -1.800126 | 0.497472  | 0.168329  |
| C | -3.088653 | 1.010334  | 0.277923  |
| C | -4.196512 | 0.231851  | -0.101235 |
| C | -3.992686 | -1.067462 | -0.589668 |
| C | -2.697937 | -1.581395 | -0.698442 |

|    |           |           |           |
|----|-----------|-----------|-----------|
| H  | -2.534574 | -2.590640 | -1.076192 |
| H  | -4.850012 | -1.674202 | -0.883190 |
| H  | -3.259154 | 2.019128  | 0.658172  |
| H  | -0.936479 | 1.097700  | 0.464017  |
| Ti | 2.044192  | 0.258464  | -0.289019 |
| O  | 0.536115  | -1.103084 | 0.807572  |
| C  | 0.195491  | -1.864457 | 1.965220  |
| C  | 1.097047  | -1.408104 | 3.095008  |
| H  | 0.894634  | -1.990740 | 4.006299  |
| H  | 0.929618  | -0.342429 | 3.313820  |
| H  | 2.151078  | -1.537466 | 2.807897  |
| H  | 0.331096  | -2.937080 | 1.747312  |
| H  | -0.870247 | -1.700736 | 2.204538  |
| O  | 3.310145  | -0.810523 | 0.439953  |
| C  | 4.705759  | -0.905001 | 0.238437  |
| C  | 5.025621  | -1.686179 | -1.028640 |
| H  | 4.597798  | -2.700057 | -0.976829 |
| H  | 6.114820  | -1.771602 | -1.172056 |
| H  | 4.593965  | -1.170181 | -1.900593 |
| H  | 5.147079  | -1.401473 | 1.122429  |
| H  | 5.149088  | 0.107381  | 0.181566  |
| O  | 2.953158  | 1.053737  | -1.603523 |
| C  | 3.597697  | 2.264159  | -1.934732 |
| C  | 2.624371  | 3.434950  | -1.932256 |
| H  | 1.828572  | 3.276448  | -2.677569 |
| H  | 3.147065  | 4.374514  | -2.172184 |
| H  | 2.153964  | 3.530040  | -0.941656 |
| H  | 4.065085  | 2.148716  | -2.929760 |
| H  | 4.416011  | 2.444710  | -1.212132 |
| O  | 1.588006  | 1.609693  | 0.796665  |
| C  | 1.933340  | 2.316163  | 1.963843  |
| C  | 3.366977  | 2.041061  | 2.396760  |
| H  | 4.069800  | 2.338063  | 1.601327  |
| H  | 3.508099  | 0.966712  | 2.590518  |
| H  | 3.613569  | 2.604113  | 3.310777  |
| H  | 1.228006  | 2.036111  | 2.769156  |
| H  | 1.790116  | 3.396097  | 1.772132  |
| H  | -8.002304 | 1.390241  | -0.888272 |
| H  | 1.481079  | -2.826516 | -2.062446 |

Int7

Geometry with 55 atoms:

Thermal correction to Gibbs Free Energy:

0.385253

Total energy: -2080.015466

|    |           |           |           |
|----|-----------|-----------|-----------|
| C  | -5.356654 | 0.237394  | 0.027535  |
| O  | -5.489608 | -1.089592 | 0.060558  |
| C  | -6.829002 | -1.620679 | 0.169507  |
| O  | -6.287649 | 1.012473  | 0.084191  |
| H  | -7.417059 | -1.267661 | -0.692801 |
| H  | -7.296490 | -1.209778 | 1.078561  |
| O  | 1.068100  | 1.229654  | -0.553170 |
| C  | 0.110758  | 2.019124  | -0.391627 |
| C  | -1.285389 | 1.563359  | -0.288458 |
| C  | -1.558341 | 0.182821  | -0.279534 |
| C  | -2.873557 | -0.261077 | -0.175418 |
| C  | -3.922976 | 0.667658  | -0.085647 |
| C  | -3.648329 | 2.044671  | -0.097633 |
| C  | -2.336555 | 2.495353  | -0.195527 |
| H  | -2.118051 | 3.563442  | -0.202816 |
| H  | -4.477735 | 2.749725  | -0.027734 |
| H  | -3.092927 | -1.328457 | -0.162357 |
| H  | -0.742847 | -0.539113 | -0.340473 |
| O  | 0.307124  | 3.299400  | -0.316284 |
| C  | 2.374452  | 3.693305  | 0.957045  |
| C  | 1.669527  | 3.837500  | -0.377409 |
| H  | 1.512366  | 4.887248  | -0.651656 |
| H  | 2.202374  | 3.323288  | -1.189359 |
| H  | 1.788251  | 4.163059  | 1.760744  |
| H  | 3.348163  | 4.203190  | 0.895940  |
| Ti | 2.320607  | -0.256757 | -0.191522 |
| O  | 3.449278  | -0.500327 | -1.513932 |
| C  | 4.762958  | -0.818717 | -1.935827 |
| C  | 5.722633  | -0.916861 | -0.760542 |
| H  | 6.737039  | -1.153830 | -1.116611 |
| H  | 5.400865  | -1.708885 | -0.066005 |
| H  | 5.086749  | -0.038437 | -2.646229 |
| H  | 4.716464  | -1.773690 | -2.488065 |
| O  | 3.220712  | 0.094646  | 1.277536  |
| C  | 3.761553  | -0.353336 | 2.507247  |
| C  | 3.356731  | -1.787268 | 2.808863  |
| H  | 3.728914  | -2.465349 | 2.024967  |
| H  | 2.260597  | -1.878761 | 2.849874  |
| H  | 3.409772  | 0.332364  | 3.297316  |
| H  | 4.859767  | -0.257062 | 2.447043  |
| O  | 1.432826  | -1.757562 | 0.043526  |
| C  | 1.320267  | -3.153753 | -0.164078 |

|   |           |           |           |
|---|-----------|-----------|-----------|
| C | 2.408780  | -3.677674 | -1.087370 |
| H | 2.363886  | -3.172859 | -2.064423 |
| H | 2.284779  | -4.760574 | -1.242360 |
| H | 0.318149  | -3.349880 | -0.583539 |
| H | 1.369503  | -3.645309 | 0.823334  |
| H | 3.404707  | -3.498465 | -0.652692 |
| H | 3.776027  | -2.105054 | 3.775905  |
| H | 2.557400  | 2.638463  | 1.208503  |
| H | 5.754629  | 0.033945  | -0.206764 |
| C | -6.724253 | -3.128986 | 0.211710  |
| H | -6.249422 | -3.514600 | -0.703482 |
| H | -6.131181 | -3.456242 | 1.079457  |
| H | -7.729937 | -3.568588 | 0.292785  |

Int8

Geometry with 55 atoms:

Thermal correction to Gibbs Free Energy:

0.388919

Total energy: -2079.944030

|    |           |           |           |
|----|-----------|-----------|-----------|
| C  | 4.741524  | -1.158527 | -0.077137 |
| O  | 5.743025  | -0.301672 | -0.304997 |
| C  | 7.084248  | -0.833312 | -0.293930 |
| O  | 4.909839  | -2.341830 | 0.136472  |
| H  | 7.265738  | -1.314387 | 0.680672  |
| O  | -1.426977 | 0.567062  | -1.041890 |
| C  | -0.561255 | 1.234028  | -0.192814 |
| O  | -0.500131 | 2.575746  | -0.391938 |
| C  | -1.741278 | 3.296618  | -0.522594 |
| H  | -2.346004 | 3.140801  | 0.386495  |
| C  | 0.840497  | 0.644204  | -0.170081 |
| C  | 0.993117  | -0.729176 | 0.076648  |
| C  | 2.263539  | -1.296103 | 0.105847  |
| C  | 3.399002  | -0.499649 | -0.115335 |
| C  | 3.244362  | 0.872163  | -0.362433 |
| C  | 1.969640  | 1.441785  | -0.387237 |
| H  | 1.847147  | 2.507794  | -0.576391 |
| H  | 4.124318  | 1.492587  | -0.534209 |
| H  | 2.394259  | -2.362126 | 0.298521  |
| H  | 0.116758  | -1.355424 | 0.249421  |
| Ti | -2.689222 | -0.212262 | 0.088565  |
| O  | -1.256408 | 0.938149  | 1.095886  |
| C  | -0.750145 | 1.433981  | 2.355282  |
| C  | -1.797623 | 1.181990  | 3.416779  |

|   |           |           |           |
|---|-----------|-----------|-----------|
| H | -1.433587 | 1.540597  | 4.390933  |
| H | -2.011393 | 0.105084  | 3.501534  |
| H | -2.731963 | 1.712137  | 3.176298  |
| H | -0.536214 | 2.505623  | 2.225721  |
| H | 0.193066  | 0.908019  | 2.570021  |
| O | -4.212941 | 0.041175  | -0.701162 |
| C | -5.427627 | -0.317599 | -1.340114 |
| C | -5.523907 | -1.819331 | -1.546567 |
| H | -4.692366 | -2.176190 | -2.173557 |
| H | -6.471568 | -2.069057 | -2.047864 |
| H | -5.490613 | -2.347639 | -0.581234 |
| H | -5.463910 | 0.222919  | -2.301140 |
| H | -6.254767 | 0.056558  | -0.713414 |
| O | -2.332234 | -1.904947 | 0.086914  |
| C | -2.293378 | -3.298923 | -0.178763 |
| C | -2.934650 | -4.072347 | 0.959382  |
| H | -3.991278 | -3.786087 | 1.075530  |
| H | -2.409109 | -3.874717 | 1.906022  |
| H | -2.885330 | -5.151926 | 0.749241  |
| H | -1.235231 | -3.579871 | -0.312203 |
| H | -2.817582 | -3.475393 | -1.132100 |
| H | 7.159752  | -1.616293 | -1.065767 |
| H | -2.303224 | 2.890419  | -1.377754 |
| C | 8.037289  | 0.313409  | -0.550390 |
| H | 9.073759  | -0.056866 | -0.550378 |
| H | 7.835338  | 0.779907  | -1.526895 |
| H | 7.943389  | 1.082880  | 0.231307  |
| C | -1.401790 | 4.758451  | -0.715610 |
| H | -0.790659 | 4.898358  | -1.620351 |
| H | -2.326463 | 5.344884  | -0.825396 |
| H | -0.842156 | 5.147751  | 0.148636  |

|   |           |           |           |
|---|-----------|-----------|-----------|
| H | -5.858397 | -0.887764 | 0.480688  |
| H | -7.347386 | 0.000103  | -1.351495 |
| H | -5.967819 | -0.893461 | -2.048722 |
| H | -5.967817 | 0.893808  | -2.048540 |
| O | 2.757568  | 0.000073  | -1.547852 |
| C | 2.281697  | 0.000033  | -0.444436 |
| C | 0.827107  | 0.000005  | -0.096489 |
| C | -0.090859 | 0.000096  | -1.155033 |
| C | -1.461868 | 0.000078  | -0.895410 |
| C | -1.923703 | -0.000030 | 0.429346  |
| C | -0.999239 | -0.000121 | 1.488286  |
| C | 0.367854  | -0.000106 | 1.229532  |
| H | 1.084947  | -0.000184 | 2.049590  |
| H | -1.373169 | -0.000206 | 2.513517  |
| H | -2.177707 | 0.000149  | -1.717809 |
| H | 0.281335  | 0.000181  | -2.180937 |
| O | 3.017400  | 1.101400  | 0.668240  |
| C | 3.908897  | 2.038824  | 0.067023  |
| C | 3.148219  | 3.278717  | -0.369444 |
| H | 4.417042  | 1.569213  | -0.793779 |
| H | 4.675913  | 2.281711  | 0.820754  |
| H | 2.403748  | 3.021355  | -1.139130 |
| H | 3.837864  | 4.025443  | -0.793777 |
| H | 2.621640  | 3.732092  | 0.484886  |
| O | 3.017424  | -1.101442 | 0.668181  |
| C | 3.908921  | -2.038812 | 0.066891  |
| C | 3.148249  | -3.278681 | -0.369659 |
| H | 4.675950  | -2.281751 | 0.820592  |
| H | 4.417055  | -1.569137 | -0.793884 |
| H | 2.621682  | -3.732121 | 0.484645  |
| H | 2.403765  | -3.021269 | -1.139316 |
| H | 3.837893  | -4.025372 | -0.794054 |
| H | 3.401900  | -0.000013 | 0.981317  |

#### TS1

Geometry with 39 atoms:

Thermal correction to Gibbs Free Energy:  
0.266114

Total energy: -922.020506

|   |           |           |           |
|---|-----------|-----------|-----------|
| C | -3.380994 | -0.000051 | 0.764814  |
| O | -4.160886 | -0.000011 | -0.322867 |
| C | -5.587964 | -0.000023 | -0.113729 |
| C | -6.253430 | 0.000115  | -1.472532 |
| O | -3.817427 | -0.000100 | 1.898003  |
| H | -5.858388 | 0.887600  | 0.480866  |

#### TS2

Geometry with 72 atoms:

Thermal correction to Gibbs Free Energy:  
0.524007

Total energy: -2389.819006

|   |          |           |           |
|---|----------|-----------|-----------|
| C | 5.505331 | -0.417640 | -0.226906 |
| O | 5.721244 | 0.887012  | -0.018539 |
| C | 7.087723 | 1.346034  | -0.057436 |
| C | 7.081096 | 2.836309  | 0.204315  |

|    |           |           |           |
|----|-----------|-----------|-----------|
| O  | 6.396424  | -1.213588 | -0.444773 |
| H  | 7.516382  | 1.099563  | -1.042301 |
| H  | 7.668079  | 0.794561  | 0.699921  |
| H  | 6.646250  | 3.058339  | 1.191036  |
| H  | 6.495993  | 3.366214  | -0.563058 |
| H  | 8.111358  | 3.223002  | 0.183907  |
| O  | -0.967065 | -1.049432 | -0.109737 |
| C  | -0.092242 | -1.907383 | 0.029872  |
| C  | 1.369495  | -1.557024 | -0.056456 |
| C  | 1.717645  | -0.213158 | 0.138765  |
| C  | 3.056642  | 0.174039  | 0.088596  |
| C  | 4.056493  | -0.779715 | -0.159860 |
| C  | 3.700438  | -2.124942 | -0.353214 |
| C  | 2.364104  | -2.514585 | -0.300091 |
| H  | 2.087369  | -3.556828 | -0.461027 |
| H  | 4.487841  | -2.855145 | -0.547665 |
| H  | 3.330836  | 1.218455  | 0.241601  |
| H  | 0.929074  | 0.512655  | 0.346329  |
| O  | -0.354757 | -3.248127 | -0.824313 |
| C  | -2.790302 | -3.407165 | -1.182233 |
| C  | -1.420866 | -3.185338 | -1.798502 |
| H  | -1.175542 | -3.951978 | -2.548367 |
| H  | -1.361802 | -2.196438 | -2.277249 |
| H  | -3.044046 | -2.589763 | -0.491711 |
| H  | -2.828849 | -4.369923 | -0.646639 |
| H  | -3.551193 | -3.434332 | -1.978465 |
| O  | -0.275297 | -2.880829 | 1.288646  |
| C  | -1.271901 | -2.485940 | 2.260583  |
| C  | -0.705740 | -1.431362 | 3.191545  |
| H  | -1.529040 | -3.413406 | 2.793778  |
| H  | -2.164203 | -2.108402 | 1.738148  |
| H  | -0.497536 | -0.506034 | 2.634233  |
| H  | -1.443836 | -1.197684 | 3.975258  |
| H  | 0.217309  | -1.786928 | 3.675263  |
| H  | -0.550134 | -3.583541 | 0.319877  |
| Ti | -2.298407 | 0.670671  | 0.029497  |
| O  | -1.026875 | 1.307537  | 1.196120  |
| C  | -0.961124 | 2.407814  | 2.067295  |
| C  | 0.227968  | 3.299043  | 1.731303  |
| H  | 0.291561  | 4.147863  | 2.431746  |
| H  | 0.132308  | 3.699376  | 0.709414  |
| H  | 1.169620  | 2.729672  | 1.789368  |
| H  | -0.869904 | 2.037920  | 3.107835  |
| H  | -1.901365 | 2.988512  | 2.007975  |

|   |           |           |           |
|---|-----------|-----------|-----------|
| O | -2.031586 | 0.761883  | -1.781354 |
| C | -0.884452 | 0.804361  | -2.591358 |
| C | -0.106742 | 2.103448  | -2.410894 |
| H | 0.191813  | 2.218045  | -1.356686 |
| H | -0.728515 | 2.970686  | -2.684549 |
| H | 0.801712  | 2.111269  | -3.034674 |
| H | -1.190831 | 0.688962  | -3.648852 |
| H | -0.229690 | -0.055540 | -2.349920 |
| O | -3.548310 | -0.517736 | 0.690720  |
| C | -4.938090 | -0.386685 | 0.860004  |
| C | -5.691186 | -0.637964 | -0.441499 |
| H | -6.779996 | -0.551611 | -0.291637 |
| H | -5.470115 | -1.644257 | -0.831419 |
| H | -5.385564 | 0.099799  | -1.201486 |
| H | -5.174096 | 0.629555  | 1.232231  |
| H | -5.269546 | -1.106729 | 1.633521  |
| O | -3.385321 | 2.123611  | 0.098042  |
| C | -3.731736 | 3.144221  | -0.800922 |
| C | -2.920569 | 4.410216  | -0.552656 |
| H | -1.846478 | 4.204335  | -0.682089 |
| H | -3.077739 | 4.781565  | 0.472537  |
| H | -3.210995 | 5.203871  | -1.260243 |
| H | -4.812732 | 3.360614  | -0.699865 |
| H | -3.558381 | 2.786797  | -1.835023 |

TS3

Geometry with 63 atoms:

Thermal correction to Gibbs Free Energy:  
0.449018

Total energy: -2234.723203

|   |           |           |           |
|---|-----------|-----------|-----------|
| C | -5.265624 | -0.329848 | 0.280681  |
| O | -5.580298 | 0.571577  | -0.659253 |
| C | -6.973951 | 0.905903  | -0.814016 |
| C | -7.080485 | 1.944511  | -1.909361 |
| O | -6.093395 | -0.864229 | 0.991400  |
| H | -7.358718 | 1.278223  | 0.149247  |
| H | -7.533842 | -0.011783 | -1.057284 |
| H | -8.134803 | 2.223710  | -2.057410 |
| H | -6.688203 | 1.552329  | -2.860329 |
| H | -6.514835 | 2.851389  | -1.645354 |
| O | 0.797709  | -2.382471 | 1.480164  |
| C | 0.414906  | -1.480750 | 0.749475  |
| C | -1.057535 | -1.161264 | 0.570186  |

|    |           |           |           |
|----|-----------|-----------|-----------|
| C  | -1.977244 | -1.807638 | 1.404697  |
| C  | -3.339226 | -1.528142 | 1.299701  |
| C  | -3.798207 | -0.598456 | 0.353863  |
| C  | -2.874411 | 0.044516  | -0.489105 |
| C  | -1.514563 | -0.236679 | -0.380682 |
| H  | -0.797989 | 0.263988  | -1.032089 |
| H  | -3.228660 | 0.765549  | -1.226400 |
| H  | -4.064632 | -2.024773 | 1.946669  |
| H  | -1.605652 | -2.527868 | 2.135281  |
| O  | 1.078081  | 0.043237  | 1.161094  |
| C  | 1.148459  | 0.340829  | 2.544993  |
| C  | -0.062808 | 1.133077  | 3.015774  |
| H  | 2.074525  | 0.910833  | 2.715020  |
| H  | 1.239463  | -0.614008 | 3.092928  |
| H  | -0.135400 | 2.088353  | 2.473637  |
| H  | -0.992111 | 0.569536  | 2.847203  |
| H  | 0.021439  | 1.351219  | 4.092570  |
| O  | 3.192855  | -0.132158 | -1.893797 |
| C  | 4.428537  | -0.729542 | -2.207134 |
| C  | 5.554535  | 0.296088  | -2.203444 |
| H  | 5.637236  | 0.766244  | -1.212032 |
| H  | 5.355584  | 1.088197  | -2.942594 |
| H  | 6.516693  | -0.180550 | -2.450128 |
| H  | 4.348229  | -1.206491 | -3.202021 |
| H  | 4.648481  | -1.539626 | -1.484656 |
| O  | 3.532001  | 1.120040  | 0.583052  |
| C  | 4.568956  | 0.934773  | 1.515645  |
| C  | 4.765006  | -0.538679 | 1.849255  |
| H  | 5.561056  | -0.668104 | 2.599056  |
| H  | 5.042919  | -1.102016 | 0.944257  |
| H  | 3.832698  | -0.970733 | 2.245009  |
| H  | 4.333406  | 1.511976  | 2.428785  |
| H  | 5.499635  | 1.362419  | 1.098362  |
| O  | 1.130522  | -1.332536 | -0.583604 |
| C  | 1.317450  | -2.540282 | -1.343236 |
| C  | 0.052351  | -2.952935 | -2.074557 |
| H  | 0.259241  | -3.839694 | -2.694385 |
| H  | -0.300883 | -2.141954 | -2.729718 |
| H  | -0.754811 | -3.206066 | -1.371222 |
| H  | 1.659756  | -3.322347 | -0.647892 |
| H  | 2.127882  | -2.311680 | -2.045630 |
| Ti | 2.257270  | 0.433041  | -0.453816 |
| O  | 1.256599  | 1.768579  | -1.113730 |
| C  | 0.518789  | 2.829283  | -0.536221 |

|   |           |          |           |
|---|-----------|----------|-----------|
| H | 0.066734  | 3.410764 | -1.360031 |
| H | -0.311026 | 2.403238 | 0.057055  |
| C | 1.379674  | 3.730691 | 0.337038  |
| H | 1.825139  | 3.155184 | 1.162786  |
| H | 2.199942  | 4.173472 | -0.249650 |
| H | 0.771317  | 4.545111 | 0.761012  |

TS4

Geometry with 57 atoms:

Thermal correction to Gibbs Free Energy:

0.396299

Total energy: -2156.067873

|    |           |           |           |
|----|-----------|-----------|-----------|
| C  | 5.465629  | 0.355470  | -0.038734 |
| O  | 5.606995  | 1.682967  | 0.083822  |
| C  | 6.919310  | 2.213114  | -0.130628 |
| O  | 6.386641  | -0.386618 | -0.311909 |
| H  | 7.632708  | 1.789213  | 0.592172  |
| H  | 6.837155  | 3.297581  | 0.007488  |
| O  | -0.824906 | -0.764096 | 1.356221  |
| C  | 0.027461  | -1.494479 | 0.733863  |
| O  | -0.077765 | -2.829367 | 0.771019  |
| C  | -1.388526 | -3.369039 | 0.962168  |
| H  | -1.273155 | -4.459036 | 0.964185  |
| H  | -1.817931 | -3.026353 | 1.914099  |
| C  | 1.450714  | -1.038849 | 0.576994  |
| C  | 1.730874  | 0.329242  | 0.707924  |
| C  | 3.027047  | 0.799550  | 0.513518  |
| C  | 4.060767  | -0.097449 | 0.192516  |
| C  | 3.778569  | -1.467348 | 0.074231  |
| C  | 2.480449  | -1.937681 | 0.265323  |
| H  | 2.258349  | -3.000435 | 0.166797  |
| H  | 4.590394  | -2.153564 | -0.172875 |
| H  | 3.245246  | 1.863987  | 0.603705  |
| H  | 0.914729  | 1.018743  | 0.928868  |
| Ti | -1.997388 | 0.163142  | -0.104501 |
| O  | -0.636530 | -1.051865 | -0.914843 |
| C  | -0.443933 | -1.781774 | -2.103331 |
| C  | 0.584661  | -1.111599 | -3.003870 |
| H  | 1.556588  | -1.037692 | -2.491706 |
| H  | 0.255777  | -0.093674 | -3.267419 |
| H  | 0.722526  | -1.685843 | -3.934442 |
| H  | -1.419617 | -1.868489 | -2.614837 |
| H  | -0.118642 | -2.804478 | -1.832742 |

|   |           |           |           |
|---|-----------|-----------|-----------|
| O | -3.179775 | -0.133332 | -1.448547 |
| C | -4.527693 | -0.544912 | -1.469698 |
| C | -5.465574 | 0.650987  | -1.368844 |
| H | -6.519020 | 0.327211  | -1.379871 |
| H | -5.303096 | 1.342012  | -2.211324 |
| H | -5.270088 | 1.192872  | -0.430674 |
| H | -4.723333 | -1.245475 | -0.634437 |
| H | -4.712781 | -1.103596 | -2.406615 |
| O | -3.175923 | 0.446380  | 1.225794  |
| C | -3.362267 | 0.184996  | 2.594225  |
| C | -2.548502 | 1.143533  | 3.453469  |
| H | -2.833636 | 2.187294  | 3.245063  |
| H | -1.478186 | 1.020311  | 3.228875  |
| H | -2.712233 | 0.943862  | 4.524881  |
| H | -3.064784 | -0.857596 | 2.809881  |
| H | -4.440393 | 0.275944  | 2.825145  |
| O | -1.264938 | 1.785172  | -0.373899 |
| C | -1.695782 | 3.104844  | -0.118613 |
| C | -2.568713 | 3.631104  | -1.249415 |
| H | -2.015794 | 3.620110  | -2.202333 |
| H | -2.891584 | 4.664460  | -1.044222 |
| H | -3.462783 | 2.998757  | -1.363992 |
| H | -0.800612 | 3.742272  | 0.005722  |
| H | -2.253278 | 3.129804  | 0.836870  |
| H | 7.268851  | 1.983443  | -1.148563 |
| H | -2.046176 | -3.062971 | 0.133493  |

TS5

Geometry with 57 atoms:

Thermal correction to Gibbs Free Energy:  
0.399404

Total energy: -2156.070732

|   |           |           |           |
|---|-----------|-----------|-----------|
| C | -5.553631 | 0.016382  | 0.010984  |
| O | -5.912495 | -0.962439 | 0.853258  |
| C | -7.295346 | -1.333159 | 0.857449  |
| O | -6.338069 | 0.579525  | -0.724438 |
| H | -7.926808 | -0.473436 | 1.127945  |
| H | -7.395943 | -2.129270 | 1.604399  |
| O | 0.834848  | 0.804374  | 1.101381  |
| C | 0.092467  | 1.297361  | 0.176032  |
| O | 0.390335  | 2.471595  | -0.374951 |
| C | 1.768931  | 2.905300  | -0.338259 |
| H | 2.059845  | 3.053740  | 0.712891  |

|    |           |           |           |
|----|-----------|-----------|-----------|
| C  | -1.374699 | 0.994803  | 0.142041  |
| C  | -1.868125 | -0.023908 | 0.968406  |
| C  | -3.220596 | -0.356578 | 0.940507  |
| C  | -4.094620 | 0.331343  | 0.082223  |
| C  | -3.597733 | 1.354365  | -0.741575 |
| C  | -2.245558 | 1.688008  | -0.711642 |
| H  | -1.858526 | 2.484338  | -1.347879 |
| H  | -4.288515 | 1.881892  | -1.401460 |
| H  | -3.605804 | -1.150124 | 1.581130  |
| H  | -1.177152 | -0.554420 | 1.624975  |
| Ti | 1.981085  | -0.693020 | 0.272327  |
| O  | 0.692187  | 0.053760  | -1.093890 |
| C  | 0.794124  | 0.331312  | -2.461755 |
| H  | 0.138685  | -0.335414 | -3.051285 |
| H  | 1.837885  | 0.203381  | -2.799770 |
| O  | 1.521147  | -2.420308 | 0.023707  |
| C  | 0.909793  | -3.099303 | -1.054602 |
| C  | -0.608008 | -3.009462 | -0.977263 |
| H  | -1.074340 | -3.556774 | -1.812399 |
| H  | -0.918322 | -1.955000 | -1.021104 |
| H  | -0.972799 | -3.439031 | -0.030436 |
| H  | 1.237945  | -4.155244 | -1.026020 |
| H  | 1.266362  | -2.677593 | -2.013822 |
| O  | 3.377436  | -0.307805 | -0.821070 |
| C  | 4.718617  | -0.744756 | -0.821842 |
| C  | 4.841252  | -2.140579 | -1.419663 |
| H  | 4.234268  | -2.852143 | -0.837419 |
| H  | 5.889397  | -2.480402 | -1.414561 |
| H  | 4.474044  | -2.149990 | -2.458373 |
| H  | 5.107760  | -0.740093 | 0.214076  |
| H  | 5.320409  | -0.021309 | -1.402791 |
| O  | 2.813864  | -0.769233 | 1.872004  |
| C  | 3.118902  | 0.089377  | 2.941970  |
| C  | 4.226876  | 1.071840  | 2.580838  |
| H  | 4.433897  | 1.752332  | 3.422419  |
| H  | 3.930443  | 1.674703  | 1.707954  |
| H  | 5.156658  | 0.538094  | 2.328141  |
| H  | 3.420906  | -0.523046 | 3.812693  |
| H  | 2.205213  | 0.642461  | 3.228300  |
| H  | -7.601929 | -1.699021 | -0.134123 |
| H  | 2.401905  | 2.105436  | -0.755337 |
| C  | 1.869404  | 4.180231  | -1.145339 |
| H  | 1.214623  | 4.961175  | -0.729369 |
| H  | 2.906068  | 4.549200  | -1.126216 |

|   |          |          |           |
|---|----------|----------|-----------|
| H | 1.582976 | 4.004144 | -2.193590 |
| H | 0.490653 | 1.376635 | -2.659227 |

TS6

Geometry with 64 atoms:

Thermal correction to Gibbs Free Energy:  
0.461371

Total energy: -2235.078522

|    |           |           |           |
|----|-----------|-----------|-----------|
| C  | -4.711597 | 0.038300  | -0.412375 |
| O  | -4.957091 | -1.246311 | -0.129350 |
| C  | -6.281064 | -1.760186 | -0.396523 |
| O  | -5.527328 | 0.793667  | -0.898863 |
| H  | -6.139461 | -2.844954 | -0.496730 |
| H  | -6.633126 | -1.354804 | -1.356741 |
| O  | 1.664602  | 0.807313  | 0.684421  |
| C  | 0.721364  | 1.676695  | 0.827241  |
| C  | -0.699891 | 1.270068  | 0.513882  |
| C  | -1.102969 | -0.040780 | 0.807105  |
| C  | -2.400784 | -0.455546 | 0.516586  |
| C  | -3.311346 | 0.439585  | -0.065553 |
| C  | -2.909202 | 1.753909  | -0.343648 |
| C  | -1.610415 | 2.170623  | -0.054368 |
| H  | -1.297683 | 3.188530  | -0.284632 |
| H  | -3.625041 | 2.440749  | -0.797717 |
| H  | -2.709704 | -1.477619 | 0.734718  |
| H  | -0.405130 | -0.750771 | 1.252953  |
| O  | 1.049430  | 3.014731  | 0.206259  |
| C  | 1.546557  | 2.627772  | -2.151898 |
| C  | 2.088253  | 3.094280  | -0.818117 |
| H  | 2.950263  | 2.498528  | -0.485741 |
| H  | 2.365910  | 4.156157  | -0.826013 |
| H  | 0.667941  | 3.218469  | -2.450357 |
| H  | 1.268692  | 1.564334  | -2.123413 |
| O  | 0.774902  | 2.362463  | 2.181191  |
| C  | 1.641623  | 1.800589  | 3.214541  |
| H  | 1.665686  | 2.589022  | 3.978505  |
| H  | 1.161326  | 3.249185  | 1.396537  |
| Ti | 2.144950  | -0.846251 | -0.185786 |
| O  | 1.104847  | -0.955607 | -1.605106 |
| C  | -0.006720 | -1.546042 | -2.256920 |
| C  | -0.860030 | -0.483405 | -2.928434 |
| H  | -1.240300 | 0.233403  | -2.186672 |
| H  | -1.720331 | -0.954717 | -3.429032 |

|   |           |           |           |
|---|-----------|-----------|-----------|
| H | -0.596549 | -2.109168 | -1.512344 |
| H | 0.378472  | -2.267615 | -2.997852 |
| O | 3.861204  | -0.814838 | -0.596056 |
| C | 4.854488  | -0.888768 | -1.603162 |
| C | 4.338408  | -0.390974 | -2.944157 |
| H | 4.025001  | 0.662363  | -2.871421 |
| H | 3.469622  | -0.985439 | -3.267040 |
| H | 5.191423  | -1.937885 | -1.676286 |
| H | 5.718008  | -0.288328 | -1.267062 |
| O | 1.720884  | -2.097941 | 0.991193  |
| C | 2.114008  | -3.150283 | 1.853382  |
| C | 3.623650  | -3.323309 | 1.889304  |
| H | 4.011408  | -3.546437 | 0.882954  |
| H | 3.895947  | -4.150909 | 2.562661  |
| H | 1.619676  | -4.075238 | 1.508380  |
| H | 1.720971  | -2.922152 | 2.859895  |
| H | 2.650579  | 1.671841  | 2.797692  |
| H | 4.110339  | -2.403562 | 2.249702  |
| H | 5.125677  | -0.469948 | -3.709908 |
| H | 2.327462  | 2.752208  | -2.917699 |
| H | -0.275826 | 0.067037  | -3.681758 |
| C | 1.078625  | 0.502608  | 3.754545  |
| H | 1.140604  | -0.301580 | 3.007851  |
| H | 1.668456  | 0.195744  | 4.631652  |
| H | 0.031119  | 0.629224  | 4.066401  |
| C | -7.241873 | -1.424465 | 0.730438  |
| H | -6.863486 | -1.804346 | 1.691958  |
| H | -7.384098 | -0.336633 | 0.808822  |
| H | -8.220866 | -1.889004 | 0.534280  |

TS7

Geometry with 55 atoms:

Thermal correction to Gibbs Free Energy:  
0.383506

Total energy: -2079.955038

|   |           |           |           |
|---|-----------|-----------|-----------|
| C | 4.915635  | -0.682495 | -0.231197 |
| O | 5.902660  | -0.103449 | 0.453745  |
| C | 7.249176  | -0.597921 | 0.257577  |
| O | 5.062964  | -1.608590 | -0.999418 |
| H | 7.217504  | -1.695965 | 0.200746  |
| H | 7.783989  | -0.301176 | 1.169718  |
| O | -0.639767 | 2.528803  | 1.488626  |
| C | -0.205058 | 1.628582  | 0.915132  |

|    |           |           |           |
|----|-----------|-----------|-----------|
| C  | 1.053610  | 1.001925  | 0.552710  |
| C  | 2.182431  | 1.570586  | 1.177156  |
| C  | 3.442907  | 1.032726  | 0.928204  |
| C  | 3.579230  | -0.060414 | 0.061264  |
| C  | 2.447724  | -0.612749 | -0.561749 |
| C  | 1.183500  | -0.091419 | -0.320637 |
| H  | 0.313167  | -0.532286 | -0.802806 |
| H  | 2.576149  | -1.461412 | -1.234462 |
| H  | 4.322499  | 1.460254  | 1.408906  |
| H  | 2.067724  | 2.419491  | 1.852579  |
| O  | -1.369510 | -0.021111 | 1.326610  |
| C  | -0.952091 | -0.927305 | 2.346436  |
| H  | -1.396456 | -0.596141 | 3.299698  |
| H  | 0.145037  | -0.845452 | 2.439014  |
| O  | -4.122608 | 0.372357  | -0.025596 |
| C  | -5.474223 | 0.242804  | 0.371653  |
| C  | -5.580169 | -0.477455 | 1.705445  |
| H  | -5.145913 | -1.487125 | 1.632148  |
| H  | -6.635425 | -0.571367 | 2.005227  |
| H  | -6.010611 | -0.307536 | -0.420510 |
| H  | -5.907204 | 1.255940  | 0.430377  |
| O  | -1.350980 | 1.458683  | -0.849354 |
| C  | -1.530613 | 2.727628  | -1.473990 |
| C  | -2.716543 | 2.711630  | -2.424742 |
| H  | -3.643101 | 2.469322  | -1.880314 |
| H  | -2.569285 | 1.960366  | -3.216223 |
| H  | -0.596488 | 2.967977  | -2.009706 |
| H  | -1.674190 | 3.487299  | -0.684987 |
| Ti | -2.412533 | 0.062731  | -0.214030 |
| O  | -2.099263 | -1.382979 | -1.171226 |
| C  | -2.566567 | -2.586545 | -1.752372 |
| H  | -2.281987 | -2.579236 | -2.818841 |
| H  | -2.028736 | -3.422105 | -1.270840 |
| C  | -4.070028 | -2.743114 | -1.590174 |
| H  | -4.599462 | -1.904506 | -2.068786 |
| H  | -4.342839 | -2.762265 | -0.523243 |
| H  | -4.408146 | -3.682281 | -2.054523 |
| H  | -2.835830 | 3.699227  | -2.896114 |
| H  | -5.040019 | 0.077748  | 2.488076  |
| C  | -1.353048 | -2.355127 | 2.016755  |
| H  | -2.447938 | -2.438155 | 1.926191  |
| H  | -0.901751 | -2.674721 | 1.065522  |
| H  | -1.017819 | -3.035357 | 2.814613  |
| C  | 7.881213  | 0.004125  | -0.984389 |

|   |          |           |           |
|---|----------|-----------|-----------|
| H | 7.875822 | 1.103603  | -0.931224 |
| H | 8.925546 | -0.334711 | -1.068298 |
| H | 7.340999 | -0.311990 | -1.888845 |

TS8

Geometry with 55 atoms:

Thermal correction to Gibbs Free Energy:  
0.390328

Total energy: -2079.946505

|    |           |           |           |
|----|-----------|-----------|-----------|
| O  | -1.249637 | 0.839049  | -1.720448 |
| C  | -0.705446 | 1.417345  | -0.644032 |
| O  | -1.036302 | 2.682384  | -0.378806 |
| C  | -2.388190 | 3.122130  | -0.641048 |
| C  | -2.487246 | 4.568211  | -0.209492 |
| H  | -2.600093 | 2.992322  | -1.712748 |
| H  | -3.078277 | 2.481194  | -0.069503 |
| H  | -1.777511 | 5.193541  | -0.772168 |
| H  | -3.505308 | 4.941214  | -0.397351 |
| H  | -2.271146 | 4.671038  | 0.864894  |
| C  | 0.758006  | 1.165267  | -0.375187 |
| C  | 1.371311  | 0.018722  | -0.899346 |
| C  | 2.713548  | -0.242256 | -0.627757 |
| C  | 3.455373  | 0.643977  | 0.169713  |
| C  | 2.838658  | 1.791337  | 0.690732  |
| C  | 1.497198  | 2.052815  | 0.420646  |
| H  | 1.018728  | 2.946457  | 0.821426  |
| H  | 3.425947  | 2.472988  | 1.308035  |
| H  | 3.192201  | -1.133299 | -1.034279 |
| H  | 0.793469  | -0.673271 | -1.512247 |
| Ti | -2.280506 | -0.622656 | -0.996959 |
| O  | -1.545053 | 0.474298  | 0.457137  |
| C  | -1.151510 | 0.252895  | 1.819273  |
| C  | -2.371827 | -0.087912 | 2.650926  |
| H  | -2.073166 | -0.265302 | 3.695102  |
| H  | -2.860764 | -0.996778 | 2.270671  |
| H  | -3.099875 | 0.736697  | 2.627087  |
| H  | -0.674709 | 1.182298  | 2.167300  |
| H  | -0.399100 | -0.552185 | 1.840732  |
| O  | -3.877938 | -0.855347 | -0.341975 |
| C  | -5.145941 | -0.625382 | 0.245355  |
| C  | -5.681823 | -1.900161 | 0.872064  |
| H  | -5.007686 | -2.259215 | 1.664493  |
| H  | -5.782116 | -2.691506 | 0.113514  |

|   |           |           |           |
|---|-----------|-----------|-----------|
| H | -6.672111 | -1.711510 | 1.314722  |
| H | -5.819814 | -0.250396 | -0.543335 |
| H | -5.028807 | 0.175550  | 0.995125  |
| O | -1.311908 | -2.063609 | -0.872704 |
| C | -1.095389 | -3.393528 | -0.419623 |
| C | -2.124607 | -3.821007 | 0.610834  |
| H | -3.142075 | -3.749154 | 0.197963  |
| H | -2.066638 | -3.184333 | 1.506934  |
| H | -1.939549 | -4.863372 | 0.912265  |
| H | -0.072520 | -3.430632 | -0.008674 |
| H | -1.123563 | -4.045954 | -1.308676 |
| C | 4.898736  | 0.412537  | 0.491821  |
| O | 5.561109  | 1.147118  | 1.195462  |
| O | 5.383586  | -0.693712 | -0.081719 |
| C | 6.770329  | -1.011303 | 0.161392  |
| C | 7.096135  | -2.272840 | -0.607406 |
| H | 6.918659  | -1.135667 | 1.246275  |
| H | 7.389364  | -0.158030 | -0.159166 |
| H | 8.149772  | -2.546025 | -0.444484 |
| H | 6.464504  | -3.110061 | -0.272759 |
| H | 6.938551  | -2.124720 | -1.686814 |

TS9

Geometry with 55 atoms:

Thermal correction to Gibbs Free Energy:  
0.391905

Total energy: -2079.946669

|   |           |           |           |
|---|-----------|-----------|-----------|
| C | 4.720210  | 0.220658  | 0.435983  |
| O | 5.195157  | -0.853612 | -0.206619 |
| C | 6.572784  | -1.225027 | 0.021146  |
| O | 5.375985  | 0.891865  | 1.206252  |
| H | 6.616756  | -2.291081 | -0.240598 |
| O | -1.458403 | 0.715454  | -1.682955 |
| C | -0.883710 | 1.295646  | -0.617111 |
| O | -1.222898 | 2.561646  | -0.341846 |
| C | -2.590193 | 2.970294  | -0.578253 |
| H | -2.773736 | 2.965297  | -1.663210 |
| C | 0.594563  | 1.066701  | -0.410856 |
| C | 1.221932  | -0.004813 | -1.058679 |
| C | 2.561653  | -0.291211 | -0.801622 |
| C | 3.286667  | 0.496795  | 0.106370  |
| C | 2.660208  | 1.582758  | 0.737657  |
| C | 1.321546  | 1.870075  | 0.479784  |

|    |           |           |           |
|----|-----------|-----------|-----------|
| H  | 0.835980  | 2.714536  | 0.969442  |
| H  | 3.237256  | 2.193025  | 1.434227  |
| H  | 3.049048  | -1.129577 | -1.299397 |
| H  | 0.654304  | -0.618177 | -1.758927 |
| Ti | -2.527173 | -0.697316 | -0.905003 |
| O  | -1.611552 | 0.340309  | 0.488484  |
| C  | -1.593829 | 0.543148  | 1.909179  |
| H  | -2.642175 | 0.533483  | 2.245925  |
| O  | -2.118320 | -2.311653 | -0.410990 |
| C  | -1.418103 | -3.458428 | 0.041843  |
| C  | 0.082266  | -3.297716 | -0.122208 |
| H  | 0.597134  | -4.198427 | 0.245761  |
| H  | 0.444742  | -2.429108 | 0.446715  |
| H  | 0.344077  | -3.153419 | -1.181501 |
| H  | -1.797769 | -4.320176 | -0.532486 |
| H  | -1.695868 | -3.614051 | 1.098381  |
| O  | -4.182699 | -0.331579 | -0.489153 |
| C  | -5.347018 | -0.739867 | 0.220494  |
| C  | -5.118477 | -2.020524 | 1.003208  |
| H  | -6.036922 | -2.298250 | 1.542567  |
| H  | -4.306828 | -1.885921 | 1.735458  |
| H  | -4.841058 | -2.845173 | 0.329365  |
| H  | -6.153786 | -0.860206 | -0.522228 |
| H  | -5.627093 | 0.093971  | 0.886025  |
| H  | 6.800123  | -1.109788 | 1.091431  |
| H  | -3.267146 | 2.234254  | -0.114729 |
| C  | -2.763938 | 4.346208  | 0.024470  |
| H  | -2.064990 | 5.063019  | -0.432793 |
| H  | -3.790698 | 4.700787  | -0.151330 |
| H  | -2.583324 | 4.322979  | 1.110000  |
| H  | -1.194460 | 1.555399  | 2.078294  |
| C  | -0.764697 | -0.523322 | 2.595370  |
| H  | -0.765012 | -0.354503 | 3.683146  |
| H  | -1.183818 | -1.521750 | 2.400297  |
| H  | 0.274776  | -0.498425 | 2.236386  |
| C  | 7.518514  | -0.400931 | -0.834663 |
| H  | 7.473920  | 0.660571  | -0.550364 |
| H  | 8.551536  | -0.755149 | -0.692654 |
| H  | 7.262394  | -0.495295 | -1.901188 |

TiOEt<sub>3</sub><sup>+</sup>

Geometry with 25 atoms:

Thermal correction to Gibbs Free Energy:

|                            |           |           |           |   |           |           |           |
|----------------------------|-----------|-----------|-----------|---|-----------|-----------|-----------|
| 0.165939                   |           |           |           | C | 2.467789  | 1.510162  | 0.955832  |
| Total energy: -1312.941934 |           |           |           | C | 2.100954  | 2.859206  | 0.349826  |
| Ti                         | 0.158558  | -0.141938 | -1.211496 | H | 1.678635  | 2.719599  | -0.657768 |
| O                          | 1.524231  | 0.360419  | -0.239412 | H | 2.986267  | 3.511054  | 0.278681  |
| C                          | 2.195479  | 0.058356  | 0.977286  | H | 1.341777  | 3.364131  | 0.968525  |
| C                          | 3.682495  | -0.125814 | 0.730886  | H | 3.253152  | 1.019626  | 0.349253  |
| H                          | 4.120433  | 0.785697  | 0.295936  | H | 2.886750  | 1.648368  | 1.970532  |
| H                          | 3.859808  | -0.965347 | 0.040990  | O | -0.622429 | 1.220003  | -1.095193 |
| H                          | 1.745170  | -0.854311 | 1.405436  | C | -1.484223 | 2.332784  | -1.126510 |
| H                          | 2.008838  | 0.890644  | 1.677108  | C | -2.792603 | 2.062588  | -0.393356 |
| O                          | -1.042226 | 1.091210  | -0.855100 | H | -3.451510 | 2.944677  | -0.432118 |
| C                          | -1.136751 | 2.329287  | -0.162151 | H | -2.595718 | 1.812318  | 0.661043  |
| C                          | -1.637741 | 2.130944  | 1.258027  | H | -3.319364 | 1.210014  | -0.851028 |
| H                          | -0.934786 | 1.506362  | 1.830865  | H | -1.686121 | 2.589499  | -2.183635 |
| H                          | -2.623472 | 1.642391  | 1.262028  | H | -0.968141 | 3.203335  | -0.678367 |
| H                          | -1.824751 | 2.972594  | -0.736790 | O | -1.242936 | -0.620326 | 1.125832  |
| H                          | -0.142527 | 2.810131  | -0.162791 | C | -2.429873 | -1.370803 | 1.205610  |
| O                          | -0.388541 | -1.603729 | -0.435242 | C | -2.450931 | -2.525617 | 0.212068  |
| C                          | -1.271402 | -2.388159 | 0.350358  | H | -3.388079 | -3.098039 | 0.300607  |
| C                          | -2.300651 | -1.534487 | 1.069232  | H | -1.604349 | -3.206494 | 0.394879  |
| H                          | -1.810667 | -0.842814 | 1.770018  | H | -2.366567 | -2.147077 | -0.819353 |
| H                          | -2.990410 | -2.178995 | 1.635716  | H | -3.290466 | -0.699013 | 1.025043  |
| H                          | -0.659790 | -2.963266 | 1.066208  | H | -2.533694 | -1.755845 | 2.237708  |
| H                          | -1.758186 | -3.110281 | -0.327534 |   |           |           |           |
| H                          | -2.882471 | -0.940057 | 0.348785  |   |           |           |           |
| H                          | -1.726815 | 3.106297  | 1.761429  |   |           |           |           |
| H                          | 4.195069  | -0.340365 | 1.681702  |   |           |           |           |

TiOEt<sub>4</sub>

Geometry with 33 atoms:

Thermal correction to Gibbs Free Energy:

0.226463

Total energy: -1467.777450

|    |          |           |           |
|----|----------|-----------|-----------|
| Ti | 0.041832 | -0.030495 | 0.015909  |
| O  | 0.678155 | -1.366502 | -1.011188 |
| C  | 1.489207 | -2.514062 | -0.928309 |
| C  | 2.868113 | -2.192053 | -0.365573 |
| H  | 3.381653 | -1.458482 | -1.007635 |
| H  | 3.488953 | -3.100046 | -0.303147 |
| H  | 2.774802 | -1.753937 | 0.640764  |
| H  | 1.582255 | -2.951284 | -1.940508 |
| H  | 0.987333 | -3.272824 | -0.297188 |
| O  | 1.351151 | 0.656585  | 1.047573  |
